# Supplementary material for: Increasing Children's Physical Activity by Policy (CAP) in Preschools Within the Stockholm Region: Study Protocol for a Cluster Randomized Controlled Trial
Source: Research Square preprint supplement (doi:10.21203/rs.3.rs-998487/v1), 2022-02-18
Supplement: Supplementary file 1 [file 85842971cce2b5760b45dbf4.docx]

**Data collection, management and dissemination plan**

**Data collection team and training**

Five to seven field works will be trained to assist the data collection. They will be trained by the corresponding author Chu Chen, who has knowledge and experience with data collection for the project. The training will be conducted in two 4-hour session with practice. The trained field works will be paired into teams to assist each other in data collection. Chu Chen will also engage in the data collection field work and will be teamed with each field work at least once to ensure the data collection quality. Chu Chen will always be available via phone should there be any question during the data collection process.

**Collection of informed consent**

Written informed consent signed by parents of the participating children and participating preschool teachers will be gathered at the respective preschools. The informed consent will then be collected by one of the trained field workers. After collection, data in the informed consent will be manually typed into database and stored securely on servers within the Centre for Epidemiology and Community Medicine, Stockholm County Health Care Area (SLSO).

**Data collection and Data management**

Participants will be asked to wear an accelerometer for 7 consecutive days for measurement of physical activity at both baseline and 6 months follow-up. The accelerometer will be distributed at the respective participating preschool. The participants’ height, weight, waist circumference and grip strength will be measured by trained field workers at the time the accelerometer is distributed. These measurements will be conducted twice to ensure data quality. After the data collection, the above measurements will be manually typed into a database on servers within the Centre for Epidemiology and Community Medicine, Stockholm County Health Care Area (SLSO). All data will be typed in by one field worker and double checked by a different field worker. Chu Chen will perform range check for the collected data.

All questionnaires are digitized. Participants will receive a unique link for the questionnaires in the email address they provided in the informed consent. The questionnaires are collected through Webropol, which is a trustworthy tool used in Region Stockholm.

**Confidentiality of data**

All data in the project will be pseudo-anonymized and presented at an aggregated level, which means that it is not possible to derive results to a specific preschool or child. All data is stored securely on servers within the Centre for Epidemiology and Community Medicine, Stockholm County Health Care Area (SLSO). No unauthorized person can access any data stored in the Centre for Epidemiology and Community Medicine, Stockholm County Health Care Area (SLSO). All personal data will be processed in accordance with the EU General Data Protection Regulation (GDPR). Centre for Epidemiology and Community Medicine (CES) is responsible for personal data, and SLSO is the data protection officer.

**Result dissemination**

The results of the study will be disseminated through a series of workshops given to Childcare stakeholders and preschool staffs. Several publications, both as reports in Region Stockholm as well as scientific literature in academic journals, will be written in order to disseminate the knowledge to different target groups.
